# Supplementary material
Source: PubMed Central journal article supplement (PMC9040199)
Supplement: NIHMS1677501-supplement-Supplemental_Figures.pdf [file NIHMS1677501-supplement-Supplemental_Figures.pdf]

# Figure S1

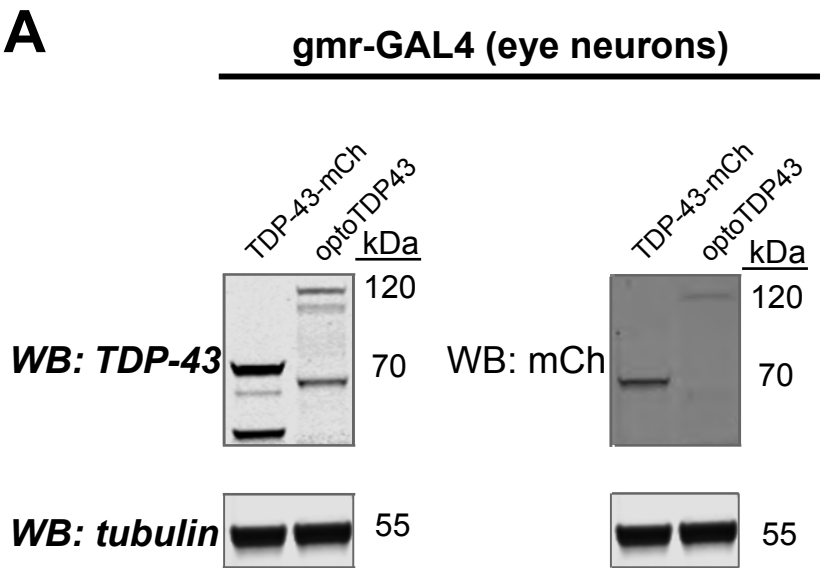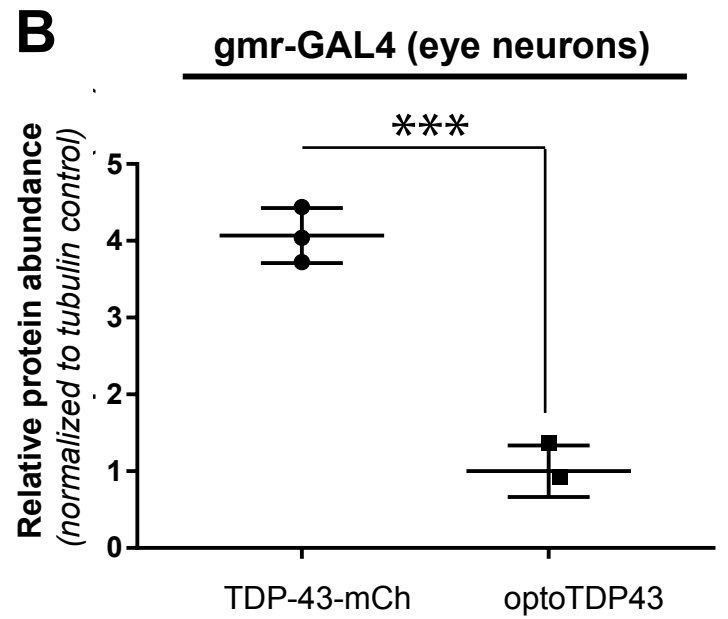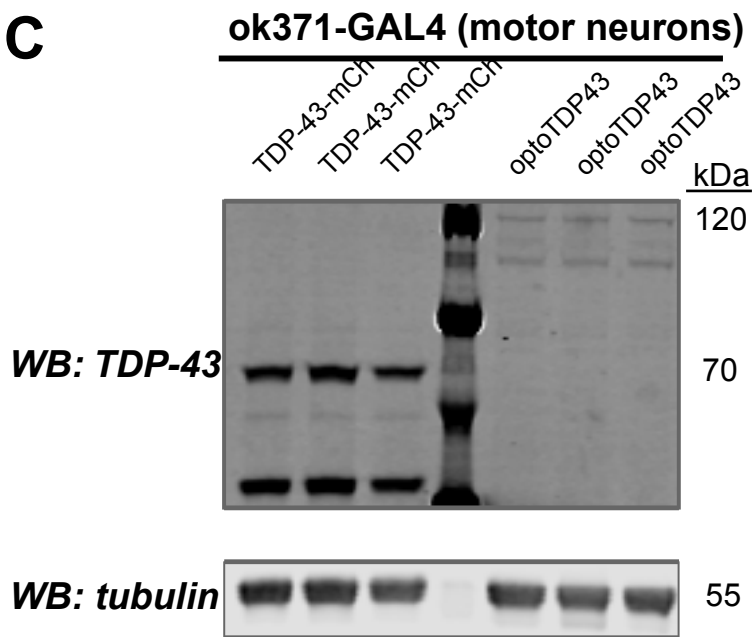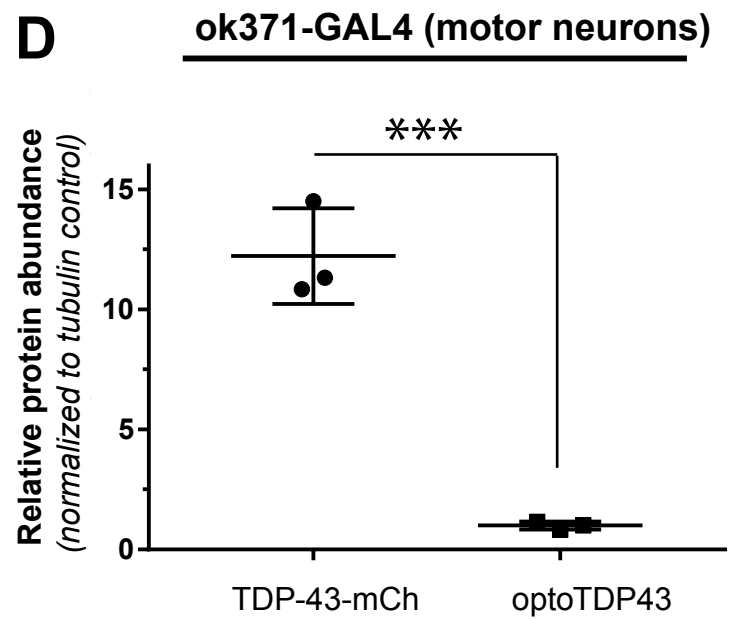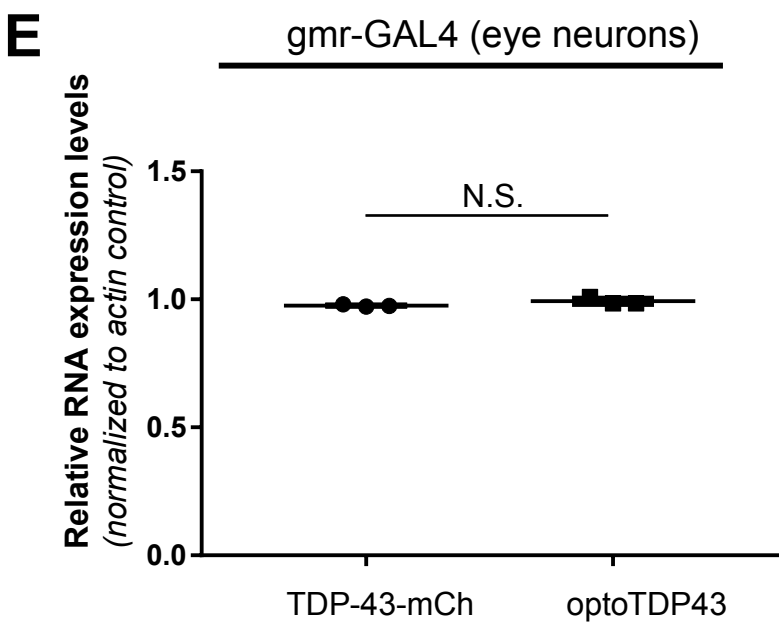

**Fig. S1. A.** Representative western blots of expression levels of gmr-GAL4;UAS-optoTDP43 and gmr-GAL4;UAS-TDP-43-mCh blotted for TDP-43 and mCherry. **B.** Quantification of TDP-43 relative protein abundance, n = 3 biological replicates per condition. \*\*\* p<.001 error bars +/- SD. Data was analyzed by Wilcoxon sum-rank test. **C.** Representative western blot of relative protein abundance of ok371-GAL4;UAS-TDP-43-mCh and gmr-GAL4;UAS-optoTDP43 larvae. **D.** Quantification of TDP-43 protein levels in ok371-GAL4;UAS-TDP-43-mCh and gmr-GAL4;UAS-optoTDP43 larvae, n = 3 biological replicates per condition. \*\*\* p<.001. error bars +/- SD. Data was analyzed by Wilcoxon sum-rank test. **E.** Quantification of qPCR data for mCherry RNA levels in gmr-GAL4;UAS-optoTDP43 and gmr-GAL4;UAS-TDP-43-mCh flies. n = 3 biological replicates per condition. p = n.s. error bars +/- SD. Data were analyzed by Wilcoxon sum-rank test.

# Figure S2

## A

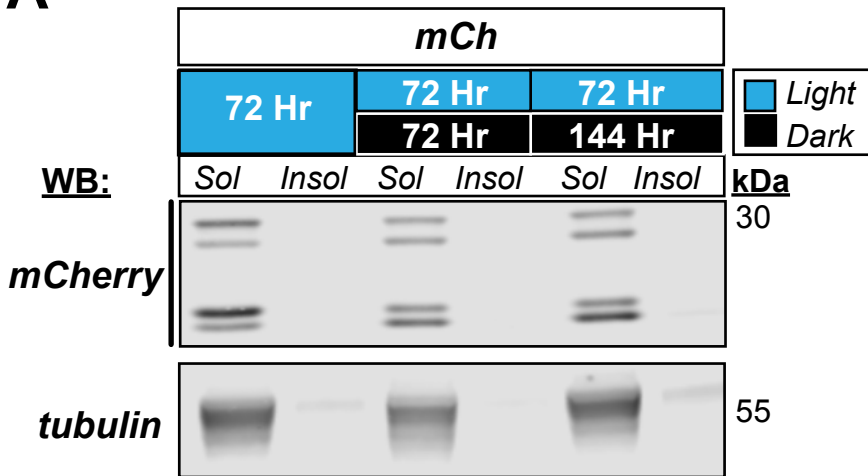

## B

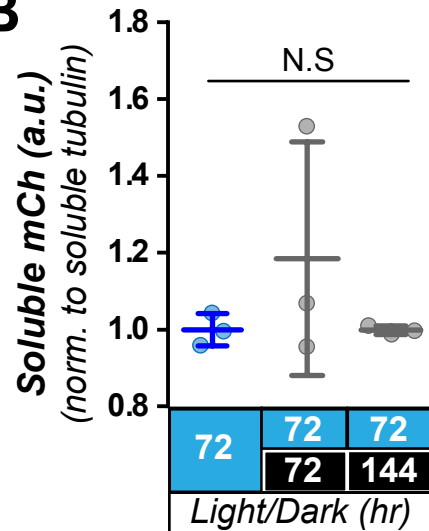

**Fig. S2. A.** Representative western blot of *gmr-GAL4;UAS-mCherry* soluble/insoluble (S/I) fractionation demonstrating unchanged mCherry expression levels from 3 days of light exposure to 3 and 6 days afterwards. **B.** Quantification of  $n = 3$  biological replicates per condition, error bars  $\pm$  SD. Data were assumed normal and analyzed by 1-way ANOVA with multiple comparisons to each other condition of mean.

**Figure S3**

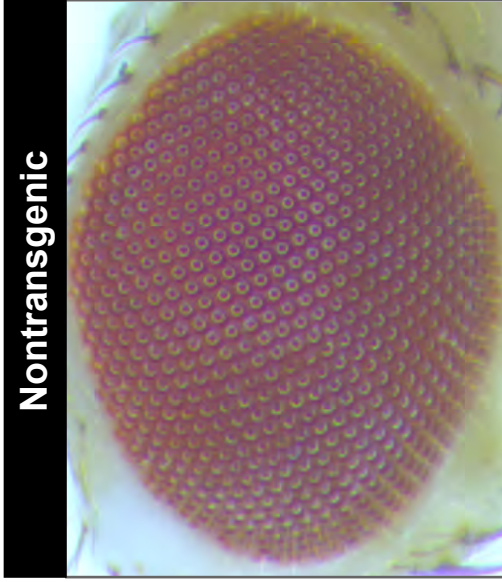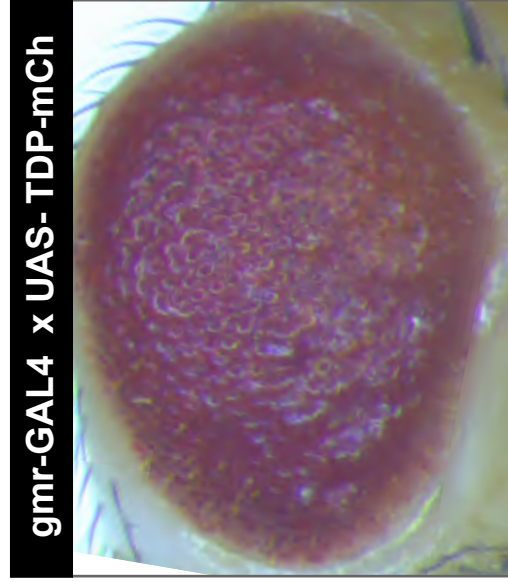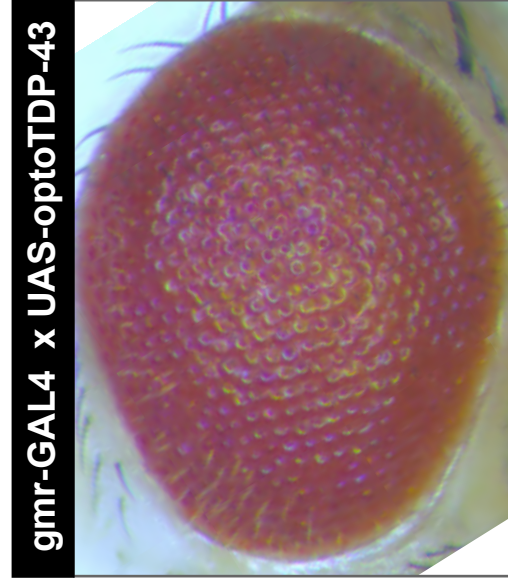

**Fig. S3. A.** Representative image of external eye phenotypes of 0-1 day old *gmr-GAL4;UAS-TDP-43-mch* and *gmr-GAL4;UAS-optoTDP43* flies raised at 29 °C.

# Figure S4

## A

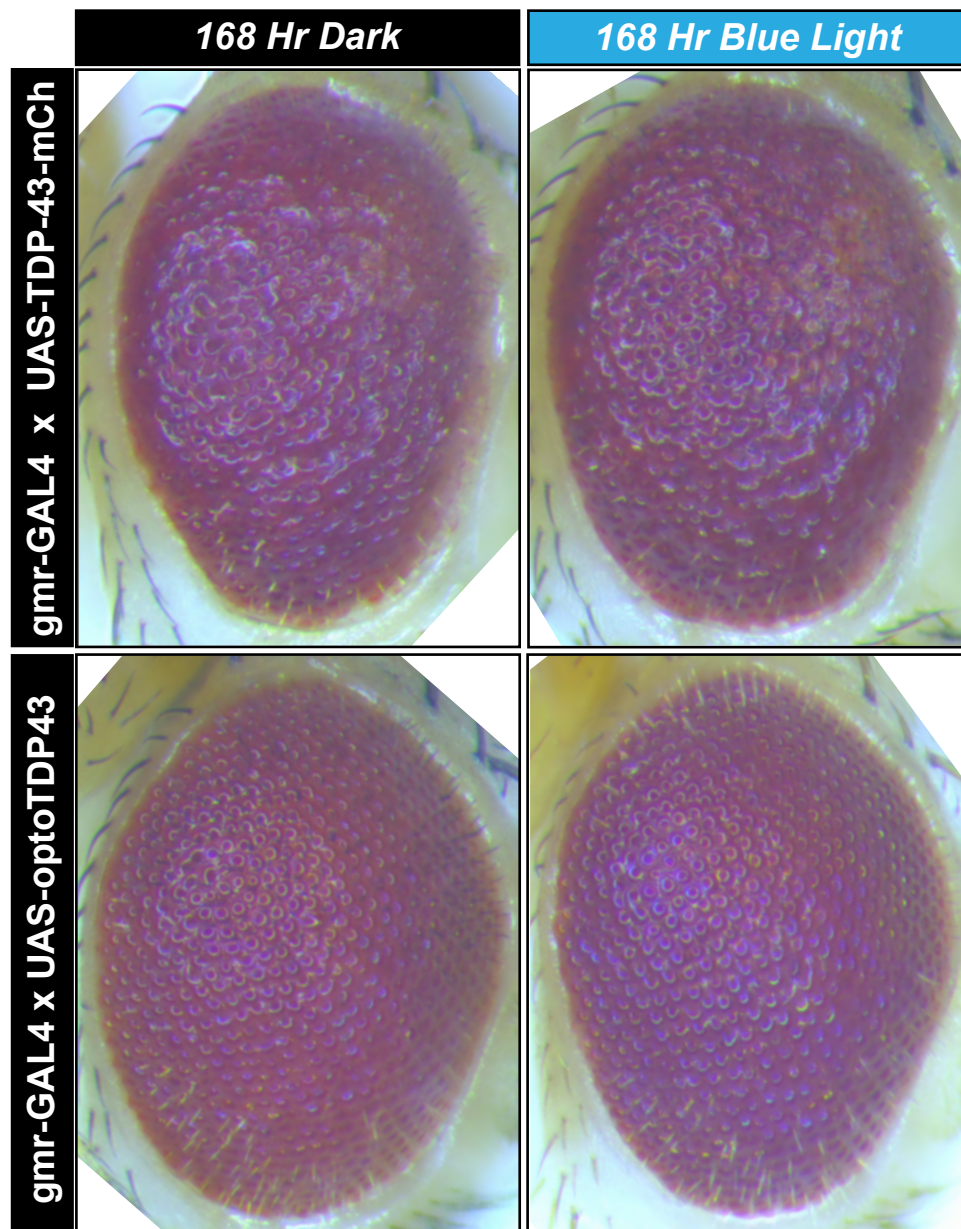

## B

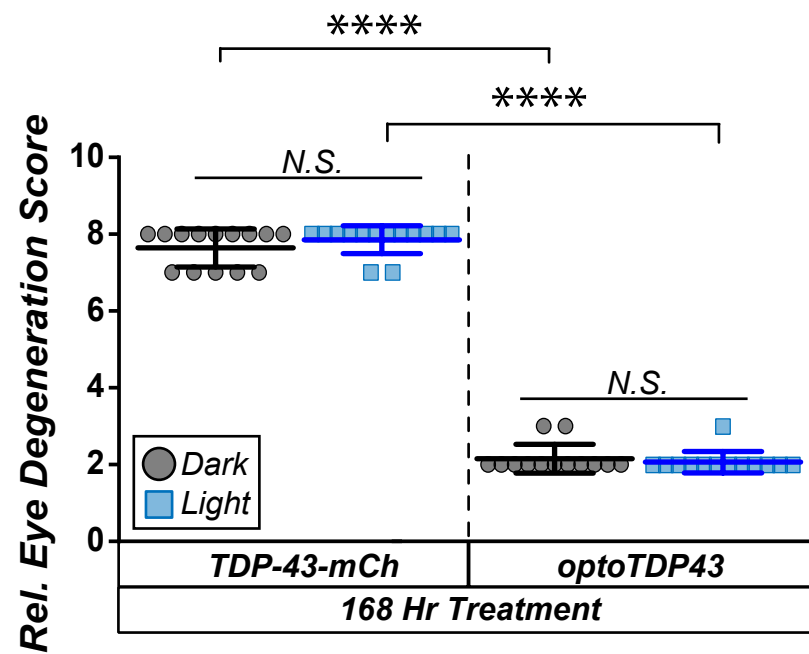

**Fig. S4. A.** Representative images of external eyes of *gmr-GAL4;UAS-TDP-43-mCh* and *gmr-GAL4;UAS-optoTDP43* flies after 7 days of blue light exposure or 7 days in the dark. **B.** Quantification of external eye degeneration in *gmr-GAL4;UAS-TDP-43-mCh* and *gmr-GAL4;UAS-optoTDP43* flies after 7 days blue light or darkness, n = 15 flies per light condition.  $p < .05$ . Data were assumed normal and analyzed by student's t-test.



**Figure S5**

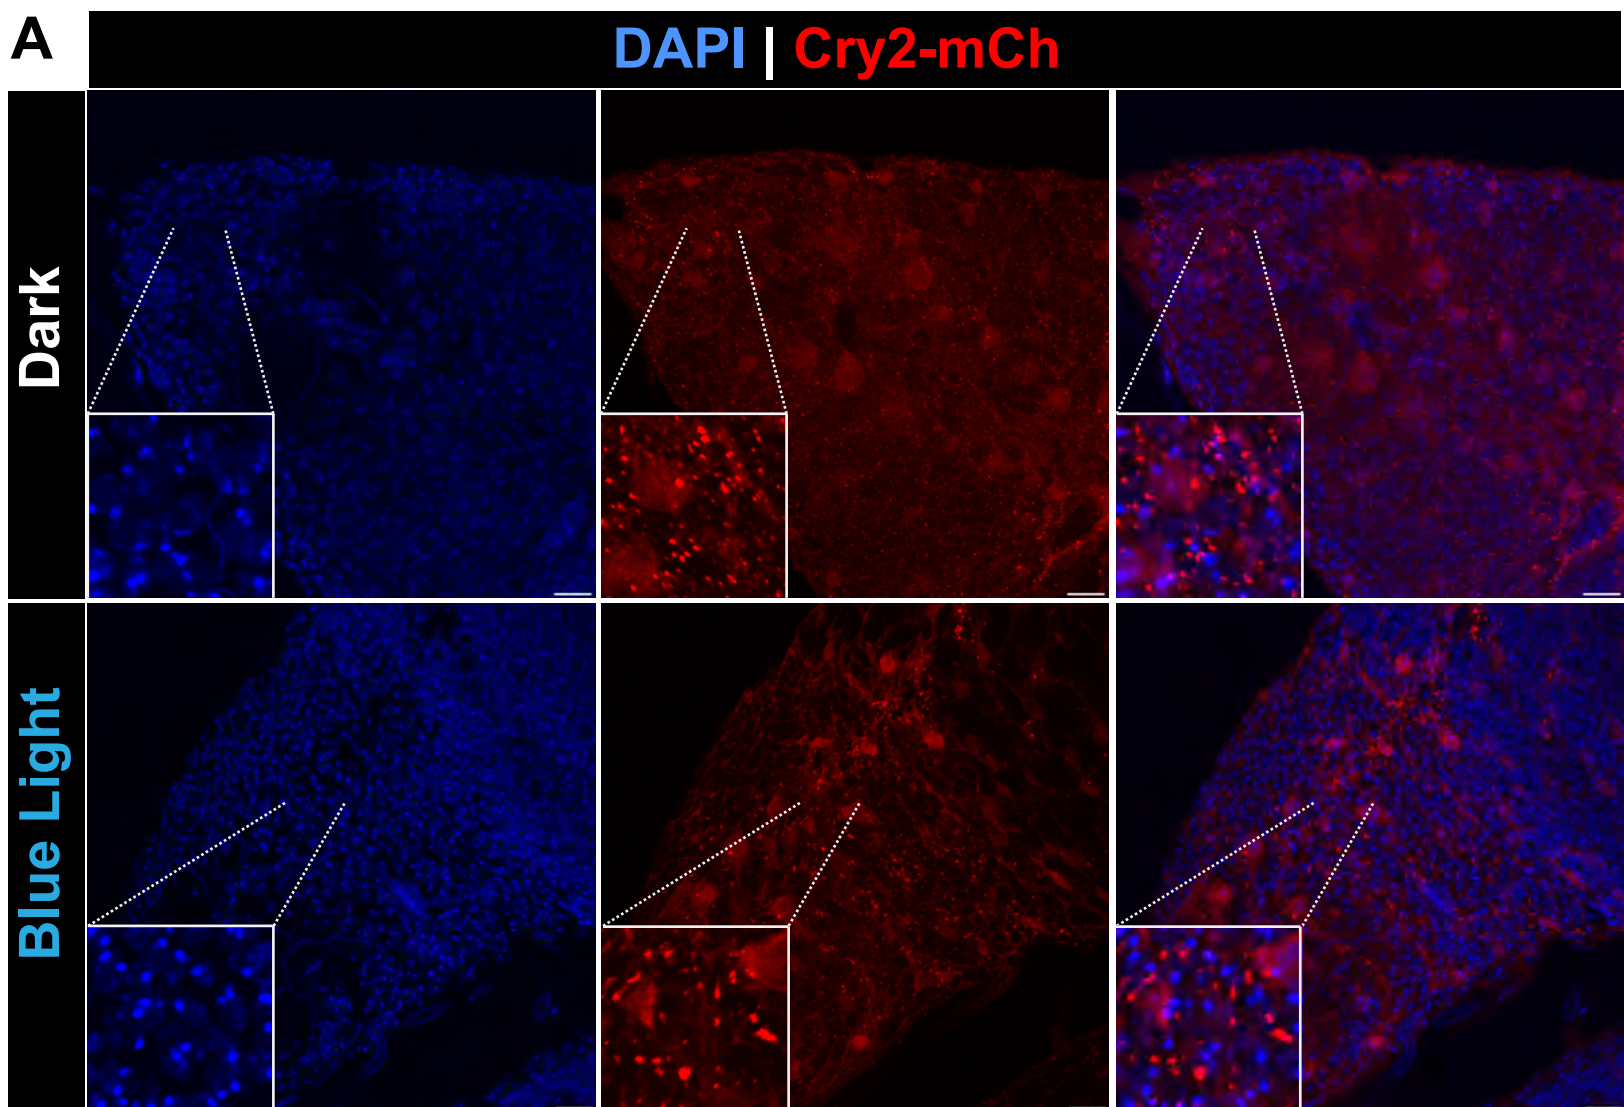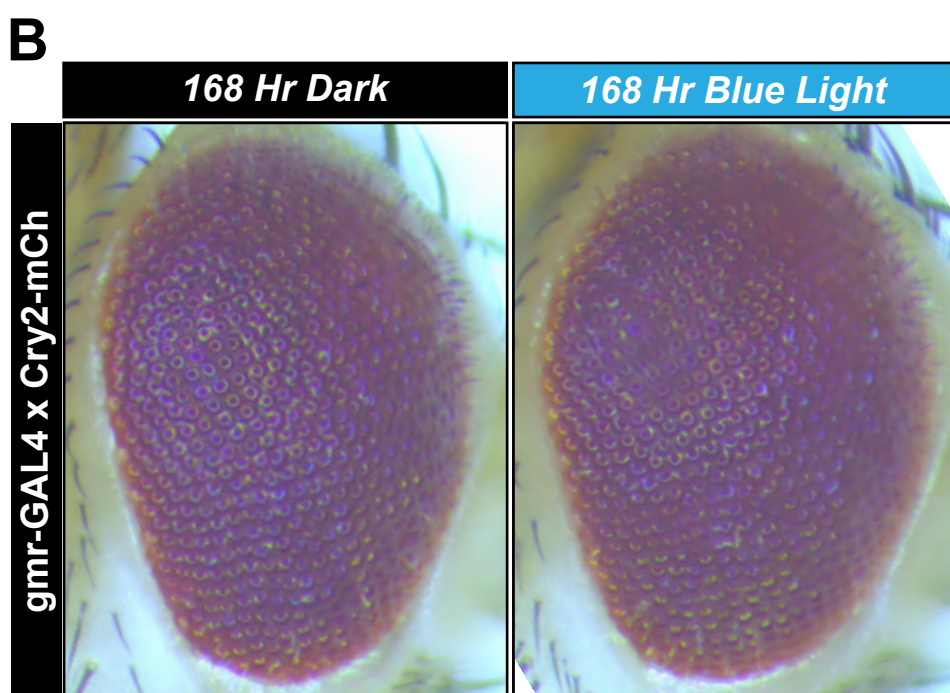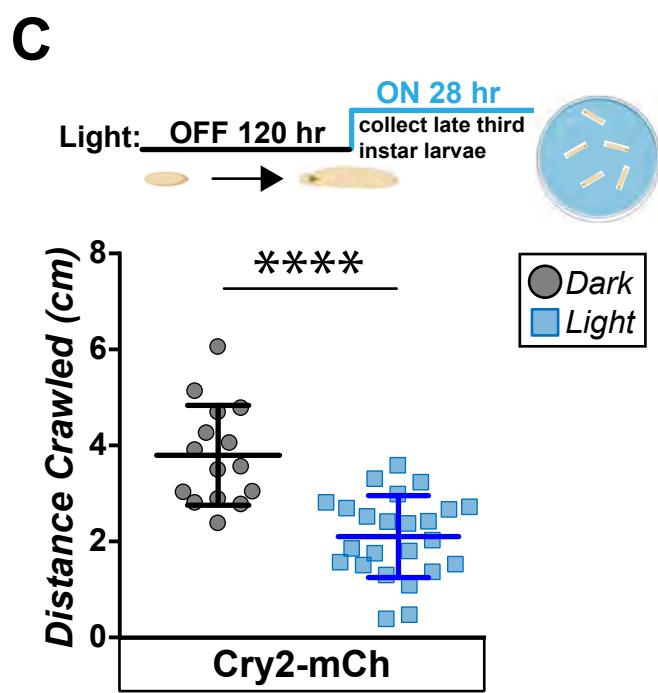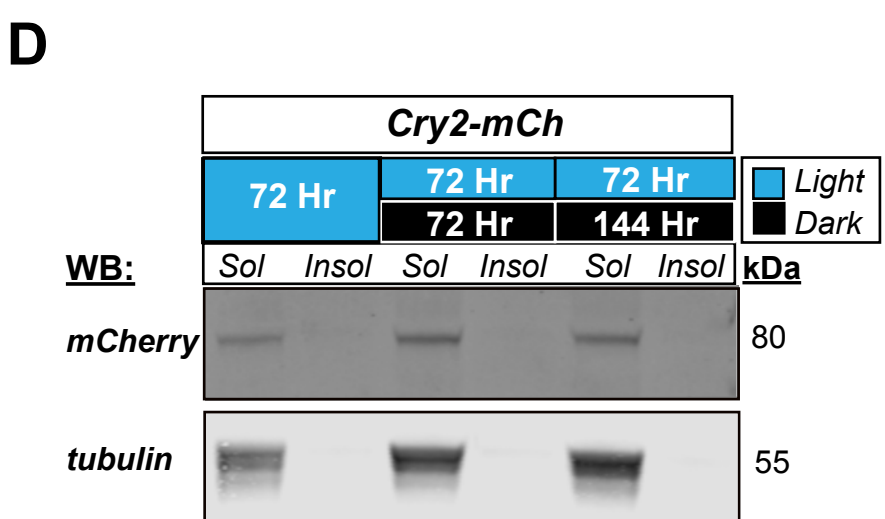

**Fig. S5. A.** 24 hours of blue light stimulation does not cause any obvious changes in puncta size, number, or cellular distribution of mCherry staining in *ok371-GAL4;UAS-Cry2-mCherry* flies. **B.** 7 days light exposure induces no changes in external eye structure in *gmr-GAL4;UAS-Cry2-mCherry* flies. **C.** *ok371-GAL4;UAS-Cry2-mCh* larvae exhibit reduced crawling distance in response to 28 hours of chronic blue light exposure  $n = 20-25$  flies. \*\*\*\* $p < .0001$ . error bars +/- SD. Data were assumed normal and analyzed by a one-way student's t-test. **D.** Representative western blots of soluble/insoluble fractionation of *gmr-GAL4;UAS-Cry2-mCherry* adult heads staining for TDP-43 after 3 days of light stimulation, 3 days of light followed by 3 days of dark, and 3 days of light followed by 6 days of dark.

## Supplemental Video Legends:

**Supplemental Video S1 Related to Figure 5. Climbing assessment of *Drosophila* expressing mCherry in motor neurons Day 1 post larval illumination.** Quantification of mCherry expressing adult *Drosophila* climbing at Day 1 after third instar larvae were illuminated for 30 hr (L, left) or kept in darkness (D, right).

**Supplemental Video S2 Related to Figure 5. Climbing assessment of *Drosophila* expressing Cry2-mCherry in motor neurons Day 1 post larval illumination.** Quantification of Cry2-mCherry expressing adult *Drosophila* climbing at Day 1 after third instar larvae were illuminated for 30 hr (L, left) or kept in darkness (D, right).

**Supplemental Video S3 Related to Figure 5. Climbing assessment of *Drosophila* expressing optoTDP43 in motor neurons Day 1 post larval illumination.** Quantification of optoTDP43 expressing adult *Drosophila* climbing at Day 1 after third instar larvae were illuminated for 30 hr (L, left) or kept in darkness (D, right).

**Supplemental Video S4 Related to Figure 5. Climbing assessment of *Drosophila* expressing mCherry in motor neurons Day 12 post larval illumination.** Quantification of mCherry expressing adult *Drosophila* climbing at Day 12 after third instar larvae were illuminated for 30 hr (L, left) or kept in darkness (D, right).

**Supplemental Video S5 Related to Figure 5. Climbing assessment of *Drosophila* expressing Cry2-mCherry in motor neurons Day 12 post larval illumination.** Quantification of Cry2-mCherry expressing
